# Supplementary material for: The complete organellar genomes of the entheogenic plant Psychotria viridis (Rubiaceae), a main component of the ayahuasca brew
Source: PeerJ journal article supplement (doi:10.7717/peerj.14114), 2022-10-18

**A**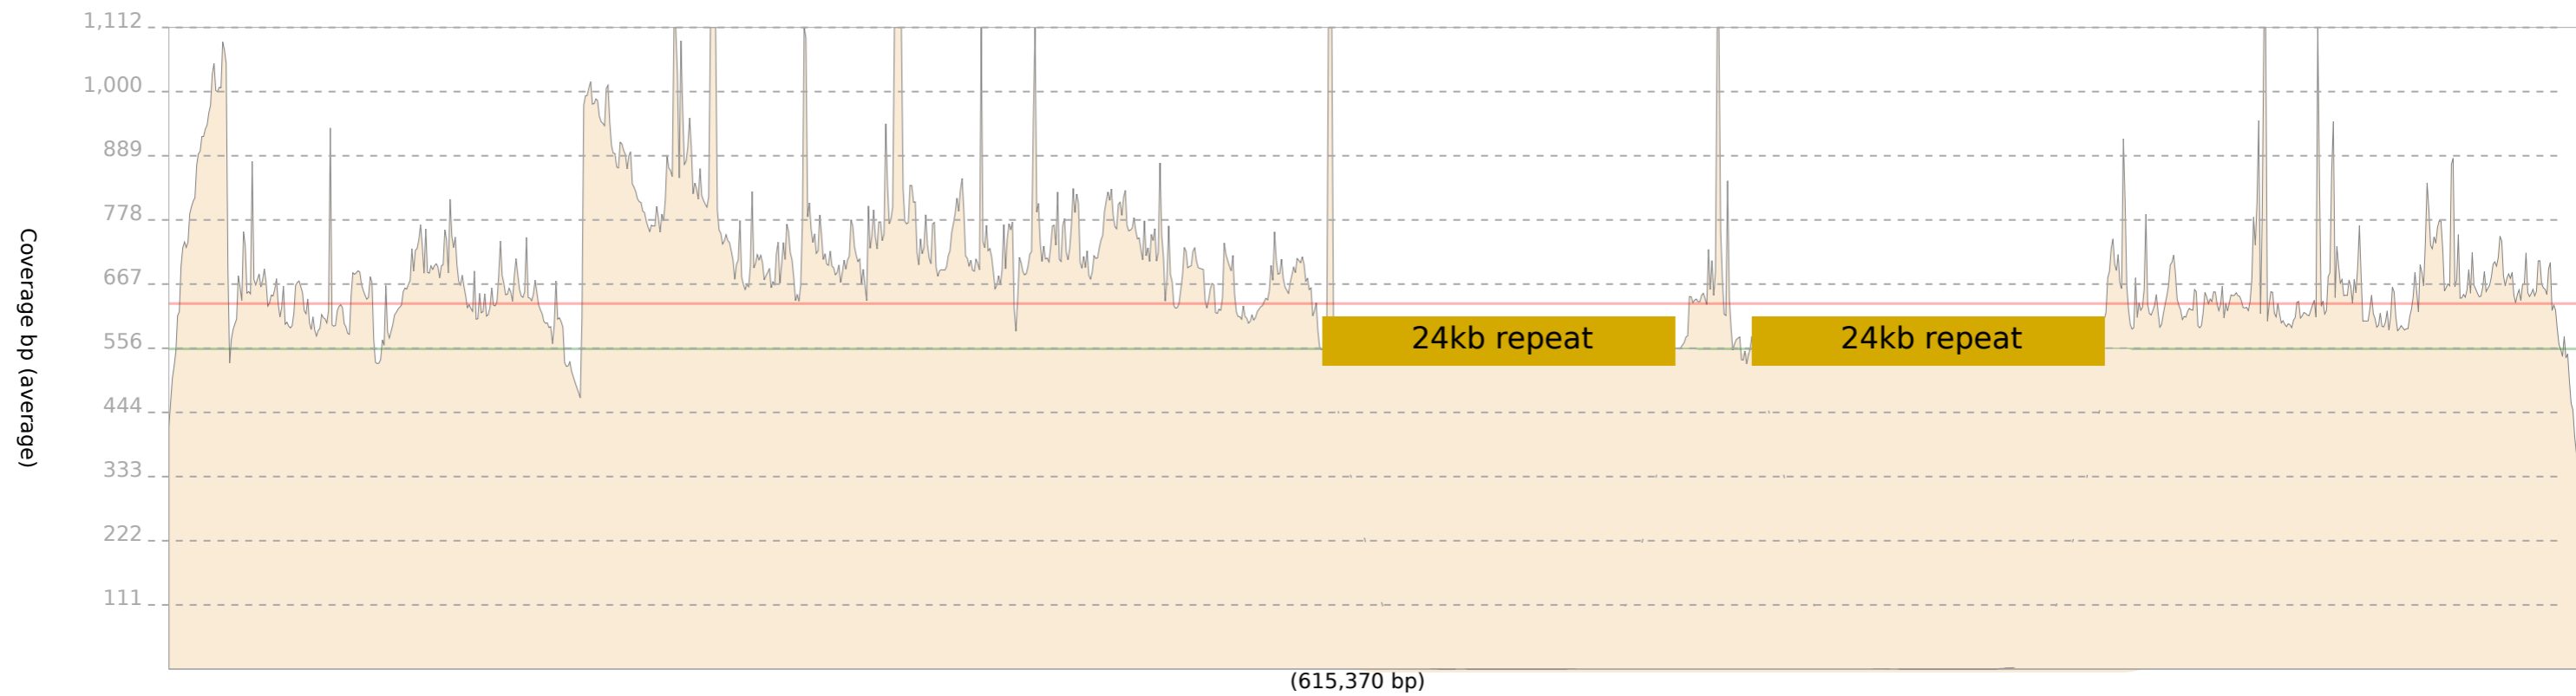**B**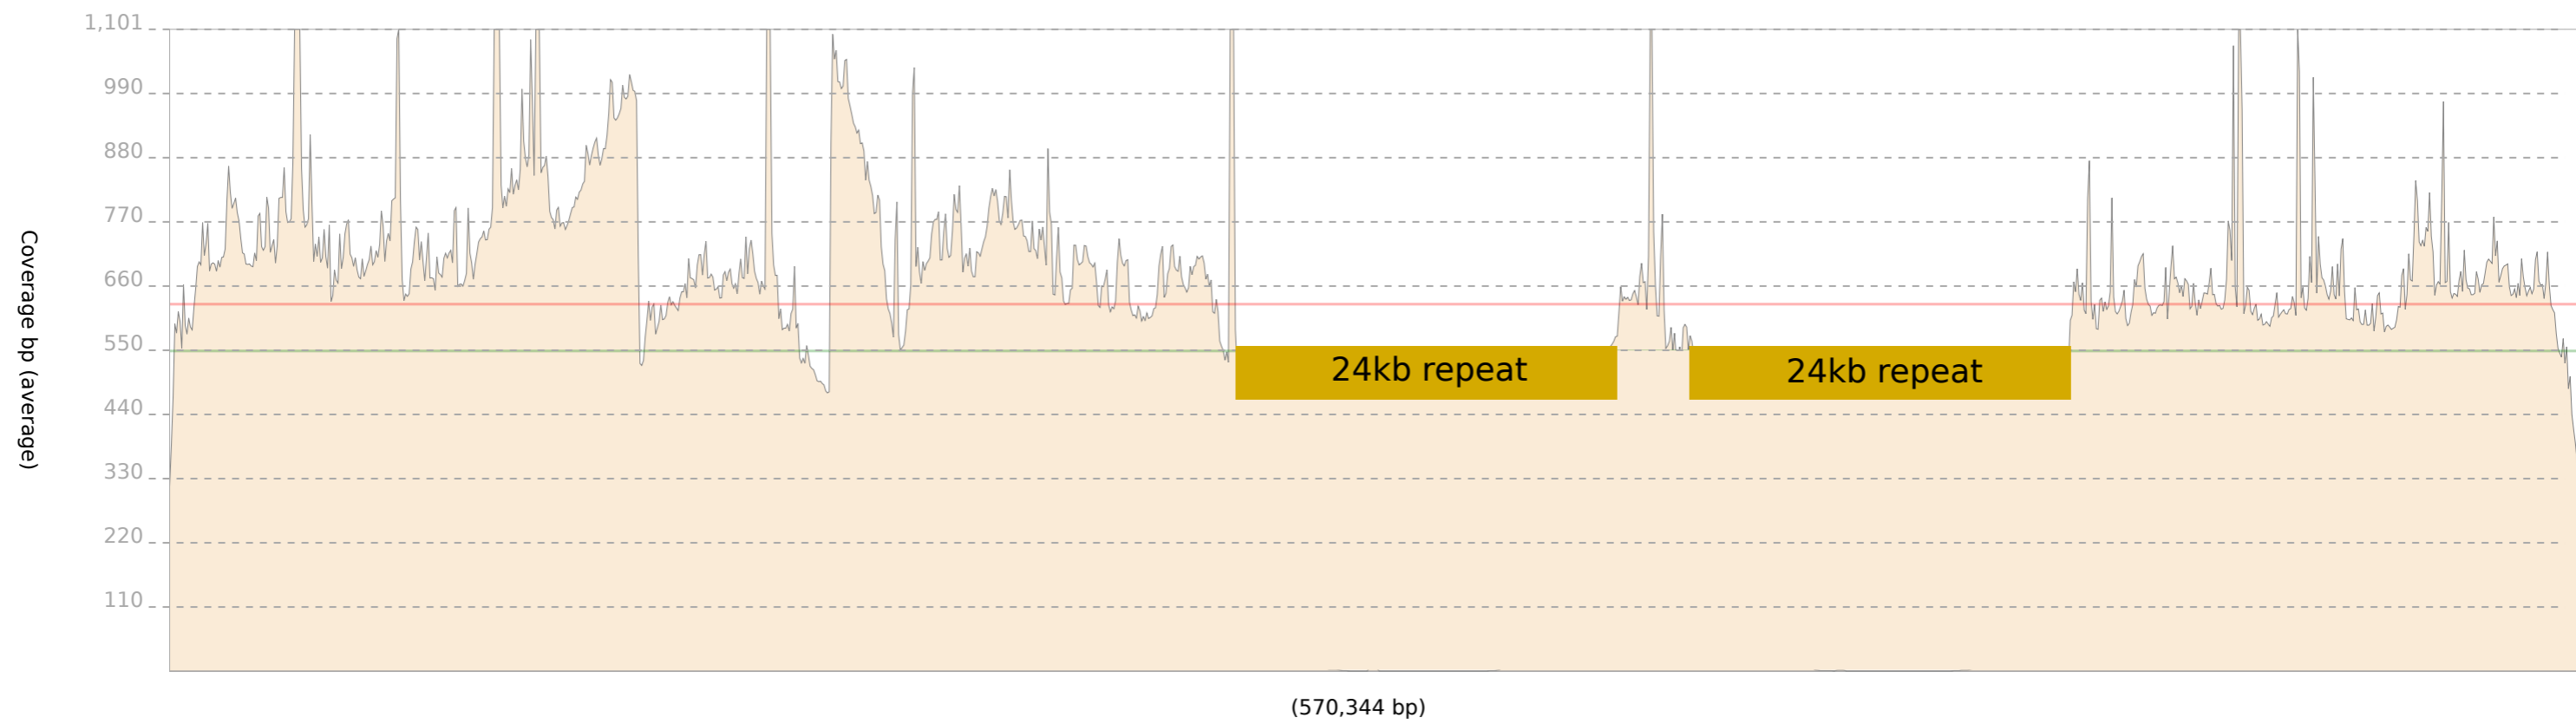

Supplement: FigureS1.pdf [file FigureS1.pdf]
